# Supplementary material for: Hydrocortisone enhances the barrier properties of HBMEC/ciβ, a brain microvascular endothelial cell line, through mesenchymal-to-endothelial transition-like effects
Source: PubMed Central journal article supplement (PMC4355132; doi:10.1186/s12987-015-0003-0), 2015-03-05
Supplement: 12987_2015_3_MOESM1_ESM.pdf [file 12987_2015_3_MOESM1_ESM.pdf]

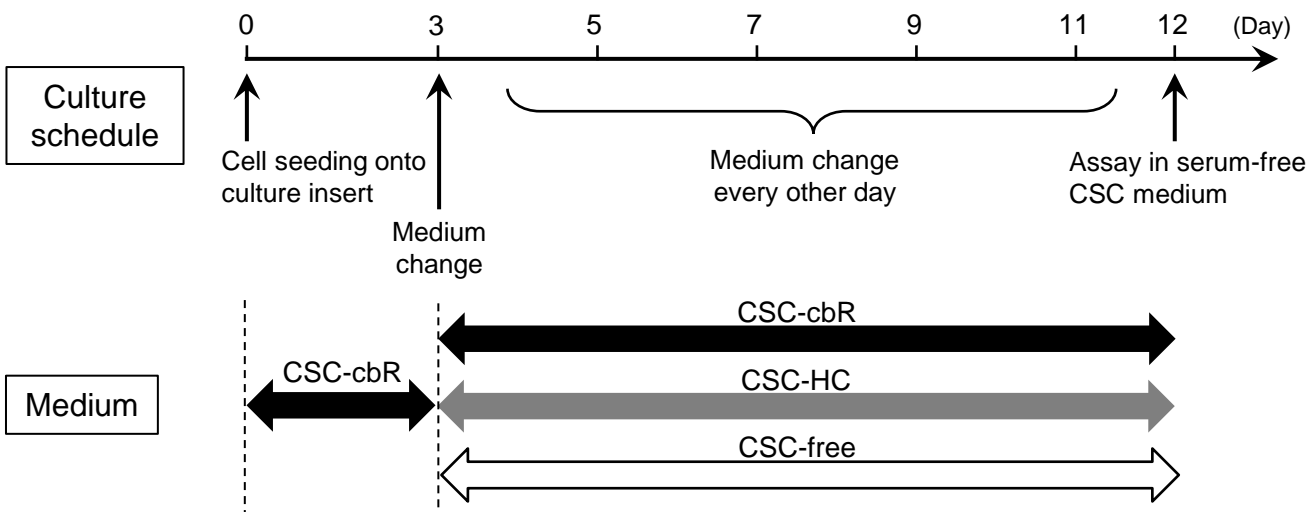

| Medium name         | CSC-cbR                   | CSC-HC                    | CSC-free                  |
|---------------------|---------------------------|---------------------------|---------------------------|
| Basal medium        | CSC medium with 10% serum | CSC medium with 10% serum | CSC medium with 10% serum |
| Culture supplements | CultureBoost-R            | HC (180 nM)               | None                      |

Figure S1
